# Supplementary material for: How to measure the effectiveness of recovery community centers: insights gained from a nationwide survey of directors of RCCs
Source: Frontiers journal article supplement (doi:10.3389/fpubh.2025.1532812), 2025-07-23
Supplement: Data_Sheet_3.docx [file Data_Sheet_3.docx]

| *Supplementary Table 1*. Univariate logistic regression results of modeling the likelihood of RCC directors finding the EUROHIS-QOL 'not useful' | | | | | | |
| --- | --- | --- | --- | --- | --- | --- |
|  |  |  |  |  |  |  |
|  |  |  | EUROHIS-QOL | | | |
|  |  |  | OR | 95% CI | *p* | r2 |
| **Physical Setting** | | |  |  |  |  |
|  | Rurality | | 0.77 | [0.15, 3.82] | 0.75 | 0.00 |
|  | US Census region | |  |  |  | 0.02 |
|  |  | Northeast | ref |  |  |  |
|  |  | Midwest | 2.05 | [0.38, 11.08] | 0.40 |  |
|  |  | South | 1.52 | [0.29, 8.09] | 0.62 |  |
|  |  | West | 2.10 | [0.32, 13.99] | 0.44 |  |
|  | Has state-level funding | | 1.25 | [0.34, 4.53] | 0.74 | 0.00 |
| **RCC size and model of care** | | |  |  |  |  |
|  | RCC Staffing, M(SD) | |  |  |  |  |
|  |  | Number of paid staff | 0.93 | [0.83, 1.05] | 0.27 | 0.04 |
|  |  | Number of volunteer staff at your RCC: | 0.98 | [0.92, 1.05] | 0.62 | 0.01 |
|  | RCC Footprints *(in medians, due to skew)* | |  |  |  |  |
|  |  | Number of RCC members last year | 1.00 | [1.00, 1.00] | 0.52 | 0.01 |
|  |  | Number of active RCC members last month | 1.00 | [1.00, 1.00] | 0.09 | 0.05 |
|  | RCC Model of Care | |  |  |  |  |
|  |  | An information-oriented place | 0.34 | [0.06, 1.86] | 0.21 | 0.03 |
|  |  | A service-oriented place | 1.35 | [0.16, 11.48] | 0.78 | 0.00 |
|  |  | A social place | did not converge due to zero cell count | | | |
| Note: r2 = max rescaled r-square | | |  |  |  |  |

| *Supplementary Table 2*. Univariate logistic regression results of modeling the likelihood of RCC directors finding the SURE 'not useful' | | | | | | |
| --- | --- | --- | --- | --- | --- | --- |
|  |  |  |  |  |  |  |
|  |  |  | SURE | | | |
|  |  |  | OR | 95% CI | *p* | r2 |
| **Physical Setting** | | |  |  |  |  |
|  | Rurality | | 0.45 | [0.1, 2.13] | 0.31 | 0.02 |
|  | US Census region | |  |  |  | 0.01 |
|  |  | Northeast | ref |  |  |  |
|  |  | Midwest | 0.68 | [0.16, 2.84] | 0.59 |  |
|  |  | South | 0.69 | [0.19, 2.55] | 0.58 |  |
|  |  | West | 0.69 | [0.13, 3.69] | 0.67 |  |
|  | Has state-level funding | | 0.78 | [0.28, 2.21] | 0.64 | 0.00 |
| **RCC size and model of care** | | |  |  |  |  |
|  | RCC Staffing, M(SD) | |  |  |  |  |
|  |  | Number of paid staff | 1.02 | [0.98, 1.06] | 0.35 | 0.01 |
|  |  | Number of volunteer staff at your RCC: | 1.01 | [0.97, 1.05] | 0.63 | 0.00 |
|  | RCC Footprints *(in medians, due to skew)* | |  |  |  |  |
|  |  | Number of RCC members last year | 1.00 | [1.00, 1.00] | 0.72 | 0.00 |
|  |  | Number of active RCC members last month | 1.00 | [1.00, 1.00] | 0.07 | 0.05 |
|  | RCC Model of Care | |  |  |  |  |
|  |  | An information-oriented place | 1.47 | [0.17, 12.57] | 0.72 | 0.00 |
|  |  | A service-oriented place | 2.31 | [0.28, 19.06] | 0.44 | 0.01 |
|  |  | A social place | 2.26 | [0.48, 10.65] | 0.30 | 0.02 |
| Note: r2 = max rescaled r-square | | |  |  |  |  |

| *Supplementary Table 3*. Univariate logistic regression results of modeling the likelihood of RCC directors finding the PERMA 'not useful' | | | | | | |
| --- | --- | --- | --- | --- | --- | --- |
|  |  |  |  |  |  |  |
|  |  |  | PERMA | | | |
|  |  |  | OR | 95% CI | *p* | r2 |
| **Physical Setting** | | |  |  |  |  |
|  | Rurality | | 0.72 | [0.24, 2.16] | 0.55 | 0.01 |
|  | US Census region | |  |  |  | 0.03 |
|  |  | Northeast | ref |  |  |  |
|  |  | Midwest | 0.60 | [0.18, 1.93] | 0.39 |  |
|  |  | South | 0.61 | [0.2, 1.85] | 0.39 |  |
|  |  | West | 0.33 | [0.07, 1.66] | 0.18 |  |
|  | Has state-level funding | | 0.98 | [0.4, 2.38] | 0.96 | 0.00 |
| **RCC size and model of care** | | |  |  |  |  |
|  | RCC Staffing, M(SD) | |  |  |  |  |
|  |  | Number of paid staff | 1.01 | [0.97, 1.05] | 0.60 | 0.00 |
|  |  | Number of volunteer staff at your RCC: | 1.00 | [0.96, 1.04] | 0.96 | 0.00 |
|  | RCC Footprints *(in medians, due to skew)* | |  |  |  |  |
|  |  | Number of RCC members last year | 1.00 | [1.00, 1.00] | 0.59 | 0.00 |
|  |  | Number of active RCC members last month | 1.00 | [1.00, 1.00] | 0.42 | 0.01 |
|  | RCC Model of Care | |  |  |  |  |
|  |  | An information-oriented place | 1.17 | [0.23, 5.99] | 0.85 | 0.00 |
|  |  | A service-oriented place | 1.74 | [0.36, 8.47] | 0.50 | 0.01 |
|  |  | A social place | 2.25 | [0.61, 8.33] | 0.22 | 0.02 |
| Note: r2 = max rescaled r-square | | |  |  |  |  |
